# Supplementary material for: Milk-derived extracellular vesicles enable gut-to-tumor oral delivery of tumor-activated doxorubicin prodrugs
Source: PubMed Central journal article supplement (PMC11413795; doi:10.7150/thno.97269), 2024-08-26
Supplement: thnov14p5413s1.pdf [file thnov14p5413s1.pdf]

## Supplementary Information for

### Milk-derived extracellular vesicles enable gut-to-tumor oral delivery of tumor-activated doxorubicin prodrugs

*Hochung Jang<sup>1,2</sup>, Jiwoong Choi<sup>1</sup>, Daeho Park<sup>1,3</sup>, Geonhee Han<sup>1,5</sup>, Eun Hye Kim<sup>1,3</sup>, Kwangmeyung Kim<sup>4</sup>, Sun Hwa Kim<sup>1,5</sup>, Man Kyu Shim<sup>1,\*</sup> and Yoosoo Yang<sup>1,2,\*</sup>*

<sup>1</sup>Medicinal Materials Research Center, Biomedical Research Division, Korea Institute of Science and Technology (KIST), Seoul, 02792, Republic of Korea.

<sup>2</sup>Division of Bio-Medical Science and Technology, KIST School, Korea University of Science and Technology, Seoul 02792, Republic of Korea.

<sup>3</sup>Department of Life Sciences, Korea University, Seoul, 02841, Republic of Korea

<sup>4</sup>College of Pharmacy, Graduate School of Pharmaceutical Sciences, Ewha Womans University, Seoul 03760, Republic of Korea.

<sup>5</sup>KU-KIST Graduate School of Converging Science and Technology, Korea University, Seoul, 02841, Republic of Korea.

\*Correspondence and requests for materials should be addressed to **Yoosoo Yang** (E-mail: [ysyang@kist.re.kr](mailto:ysyang@kist.re.kr)) and **Man Kyu Shim** (E-mail: [mks@kist.re.kr](mailto:mks@kist.re.kr)).

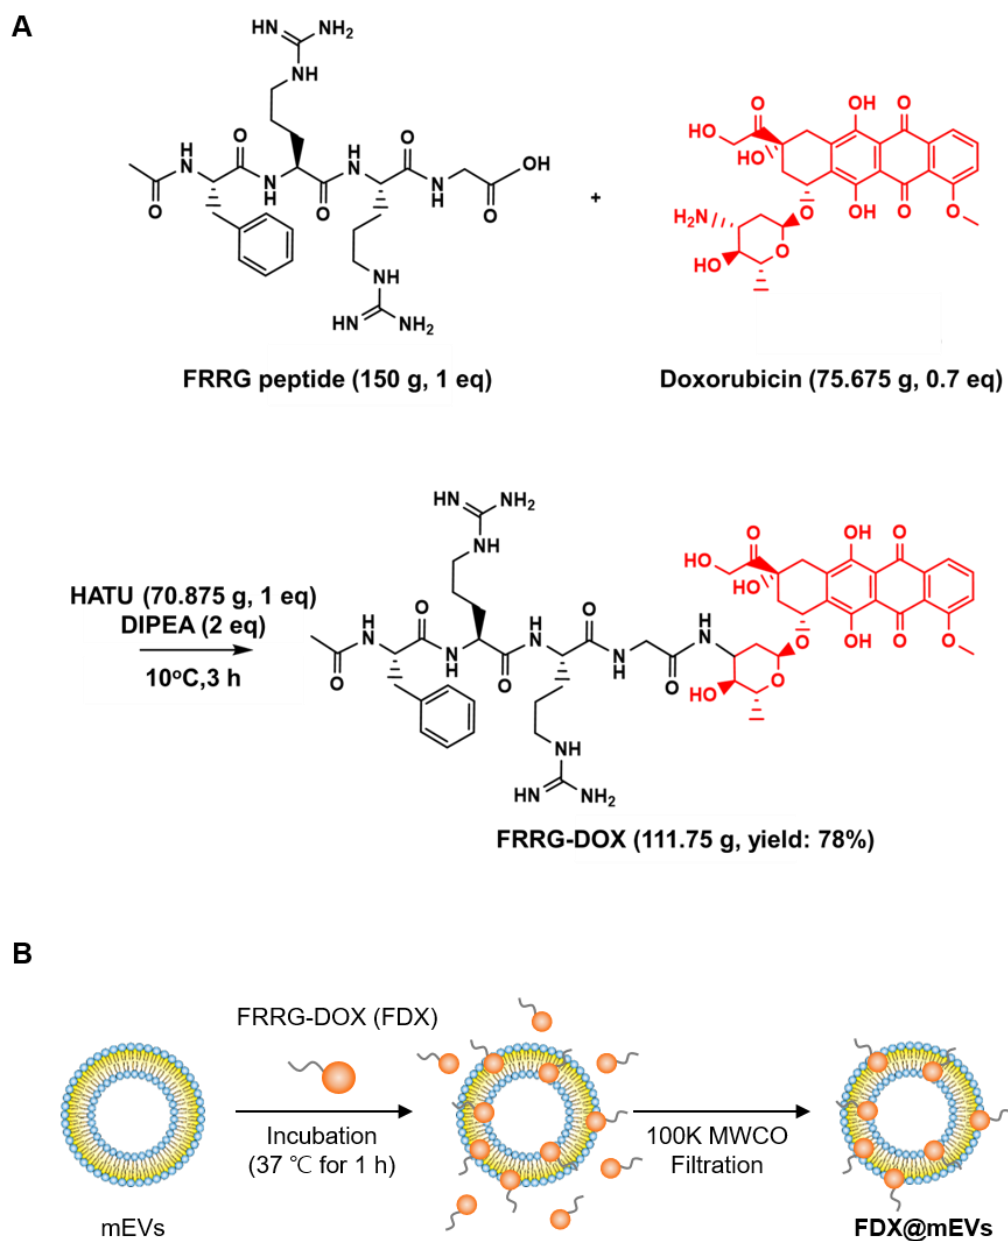

**Figure S1.** (A) Synthetic route for preparing the tumor-activated doxorubicin prodrug, FDX. (B) Schematic representation of the methodology used to prepare the mEVs complexed with FDX.

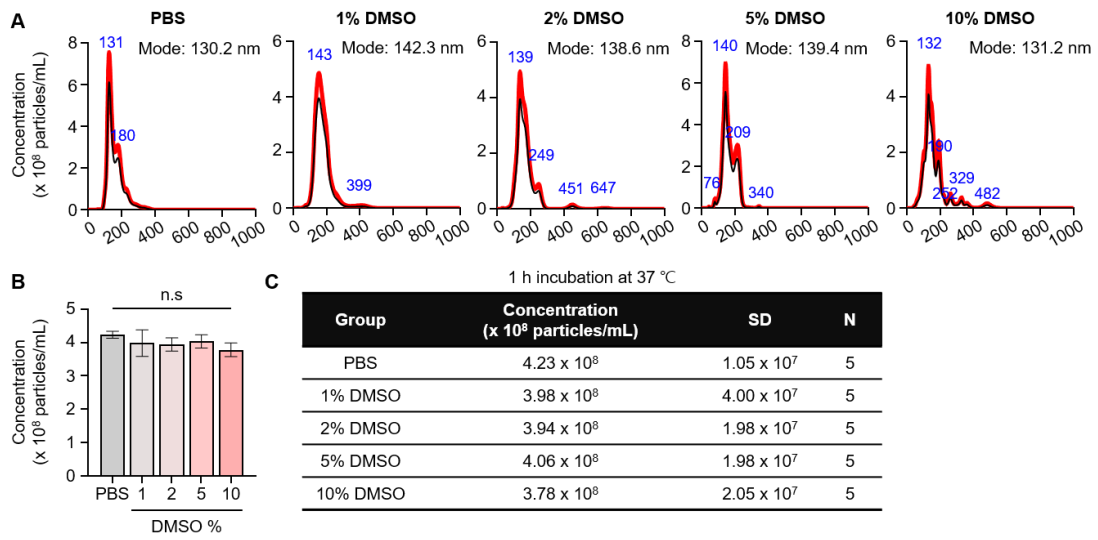

**Figure S2. (A-C)** Size distribution and concentration of mEVs after incubation in various DMSO %

(v/v)

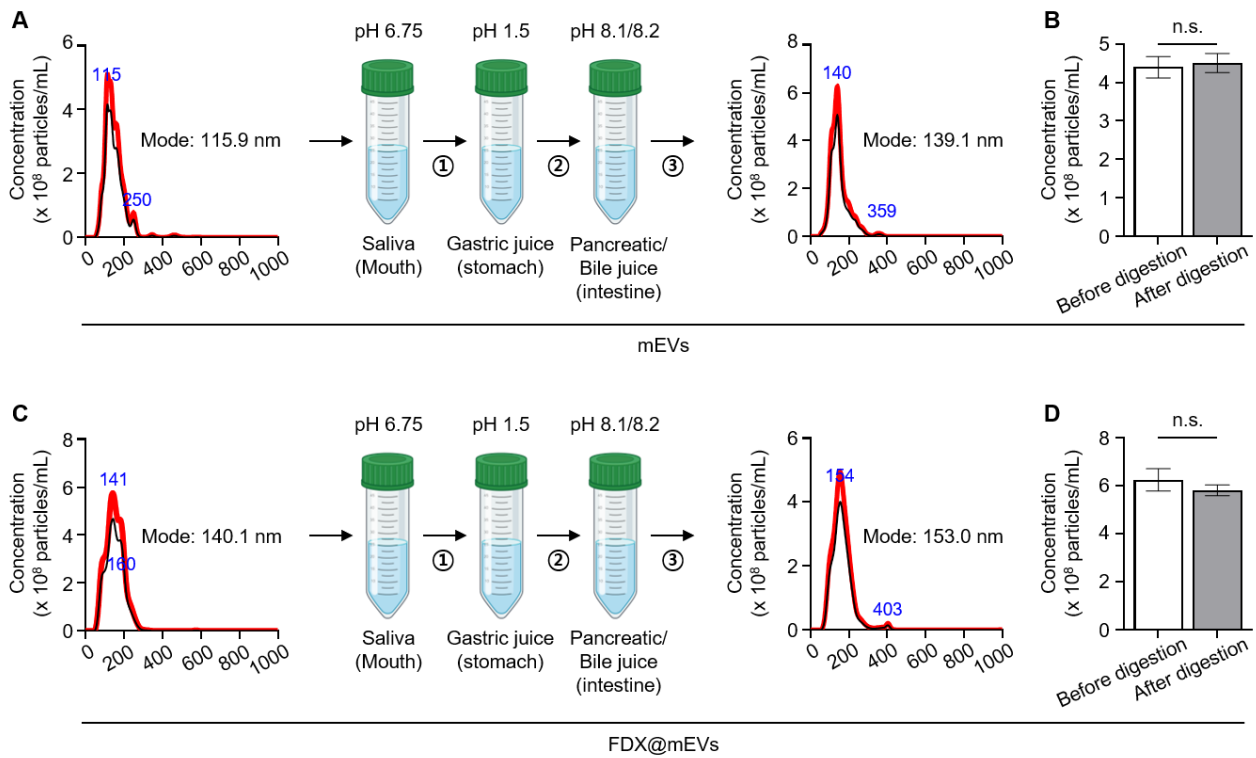

**Figure S3.** (A-B) Size distribution and concentration of mEVs after incubation in *ex vivo* digestive system. (C-D) Size distribution and concentration of FDX@mEVs after incubation in *ex vivo* digestive system. 1: 37°C, 5 min; 2: 37°C, 120 min; 3: 37°C, 60 min.

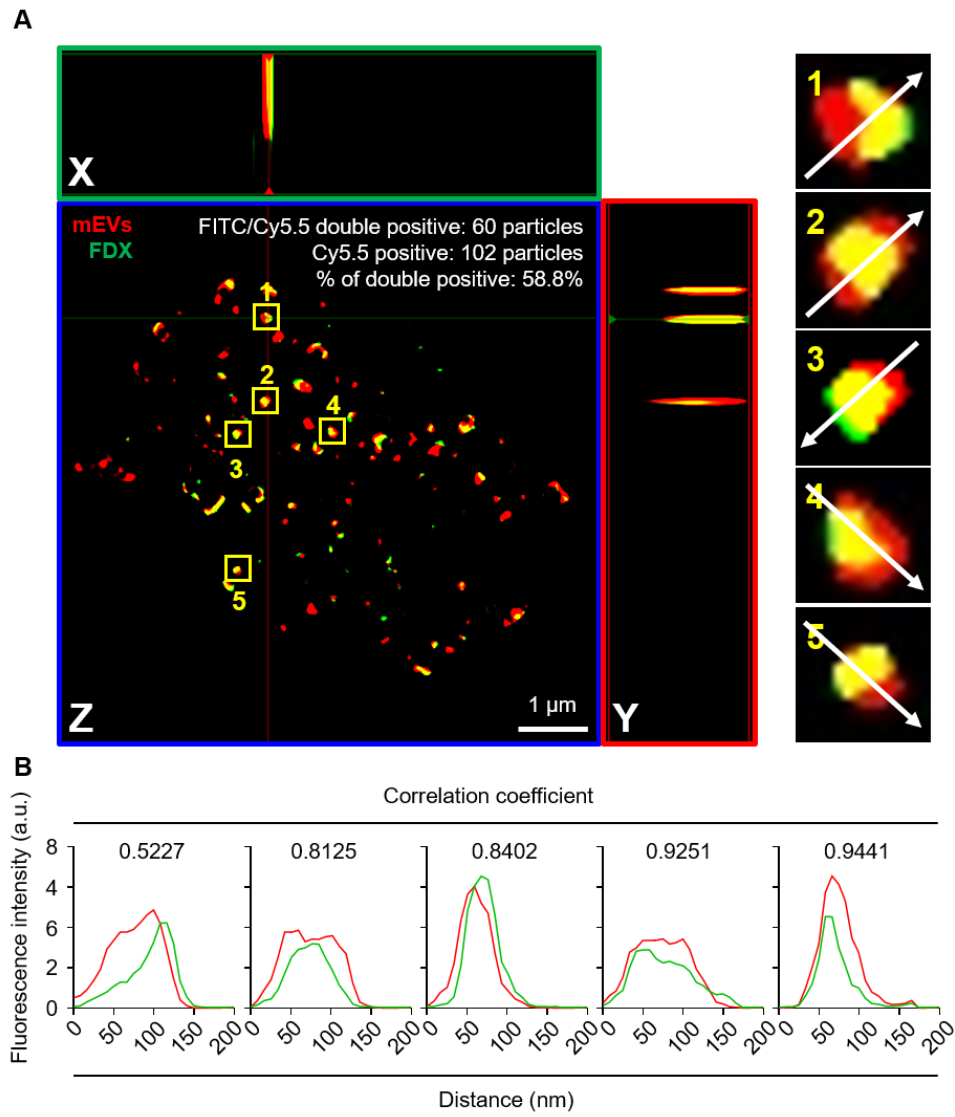

**Figure S4.** (A) Super-resolution microscopy image of FDX@mEVs. (B) Correlation coefficient of representative FDX@mEVs.

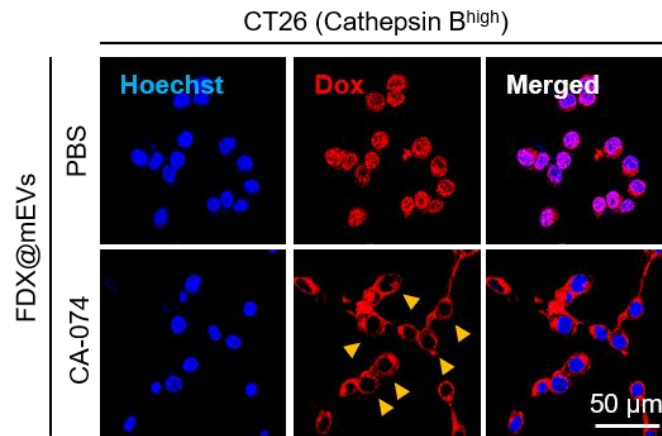

**Figure S5.** The nuclear translocation behavior of FDX depending on cathepsin B inhibition

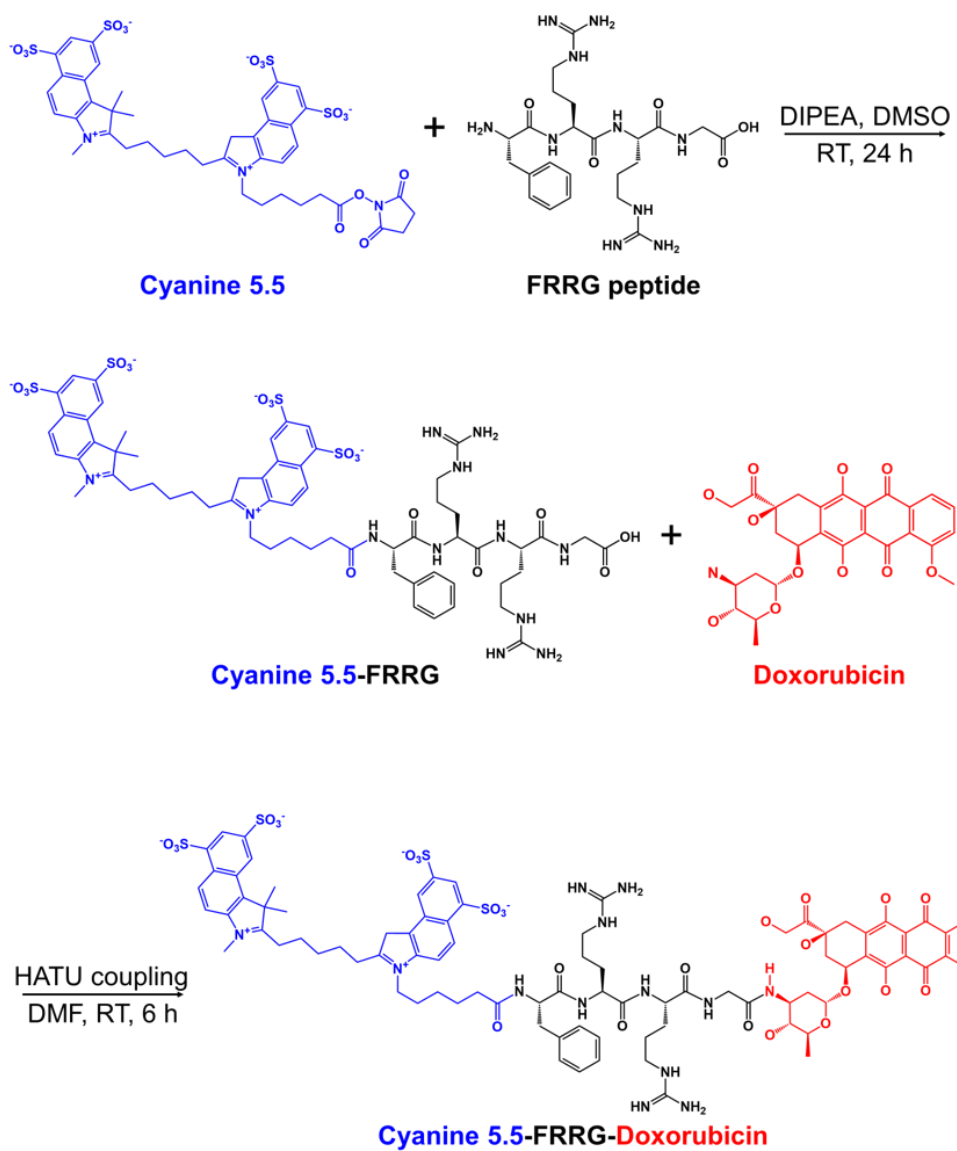

**Figure S6.** Synthetic route for preparing the Cy5.5-labeled FDX.

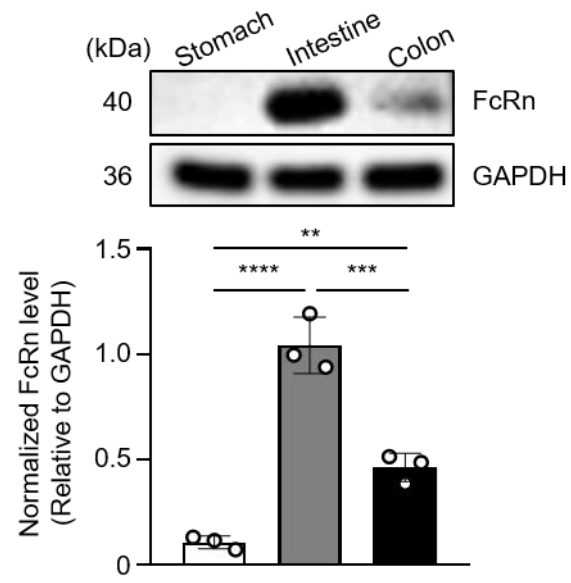

**Figure S7.** FcRn expression levels in mouse stomach, intestine, and colon



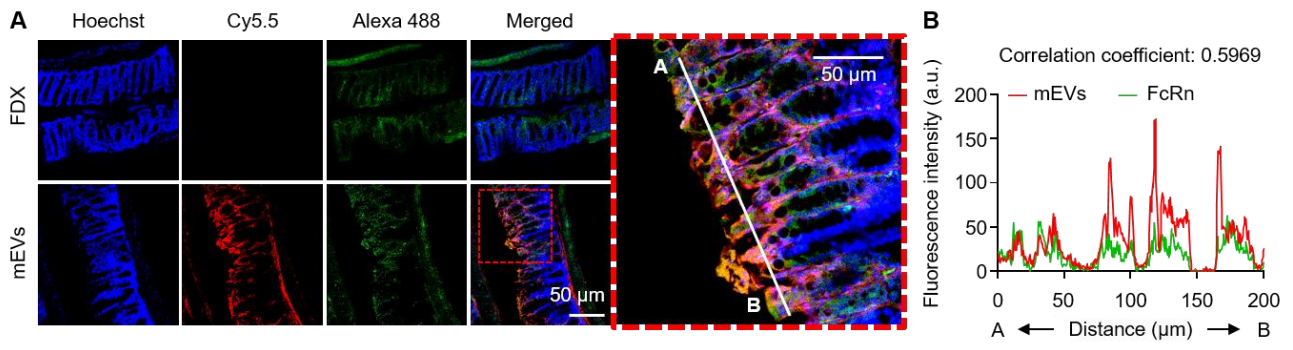

**Figure S8. (A-B)** The histological analysis of FDX, mEVs, and FcRn in the colon region.

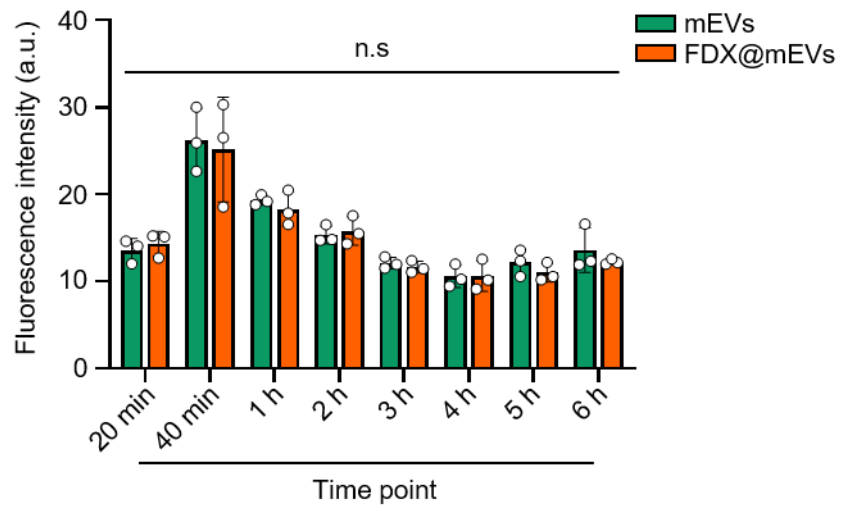

**Figure S9.** Blood analysis after oral administration of mEVs and FDX@mEVs

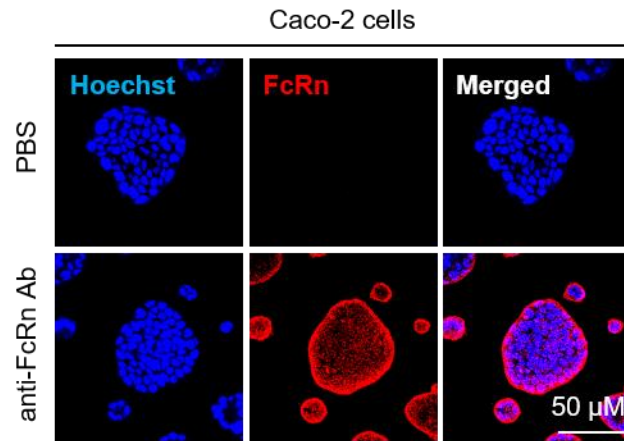

**Figure S10.** FcRn expression in Caco-2 cell line

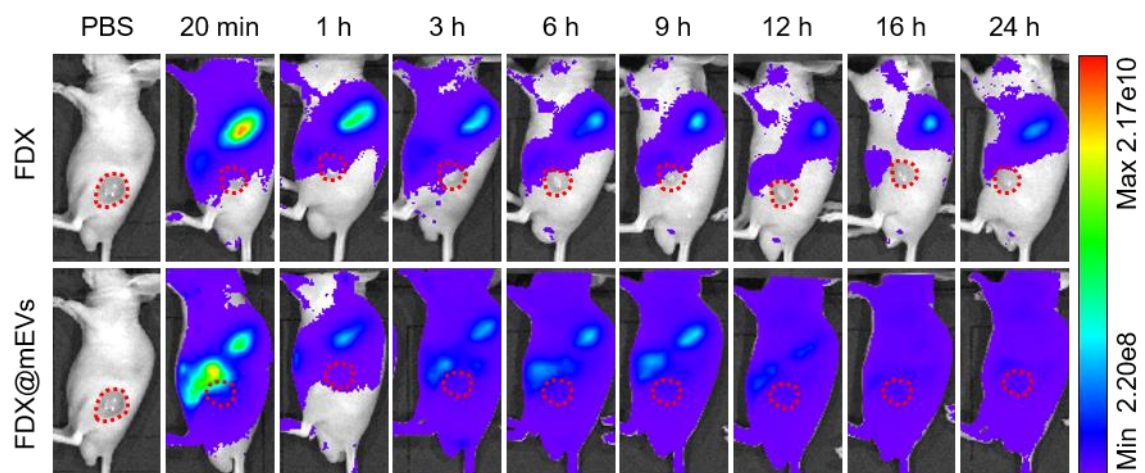

**Figure S11.** In vivo NIRF whole-body imaging after oral administration of FDX and FDX@mEVs in CT26 tumor-bearing mice at various time points (20 min, 1 h, 3 h, 6 h, 9 h, 12 h, 16 h, 24 h).

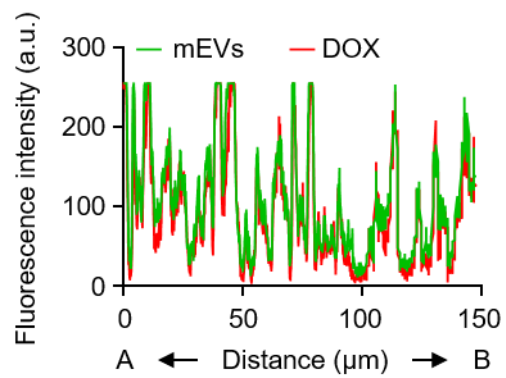

**Figure S12.** Correlation analysis between mEVs (green) and DOX (red) fluorescence signals in Figure 4C.

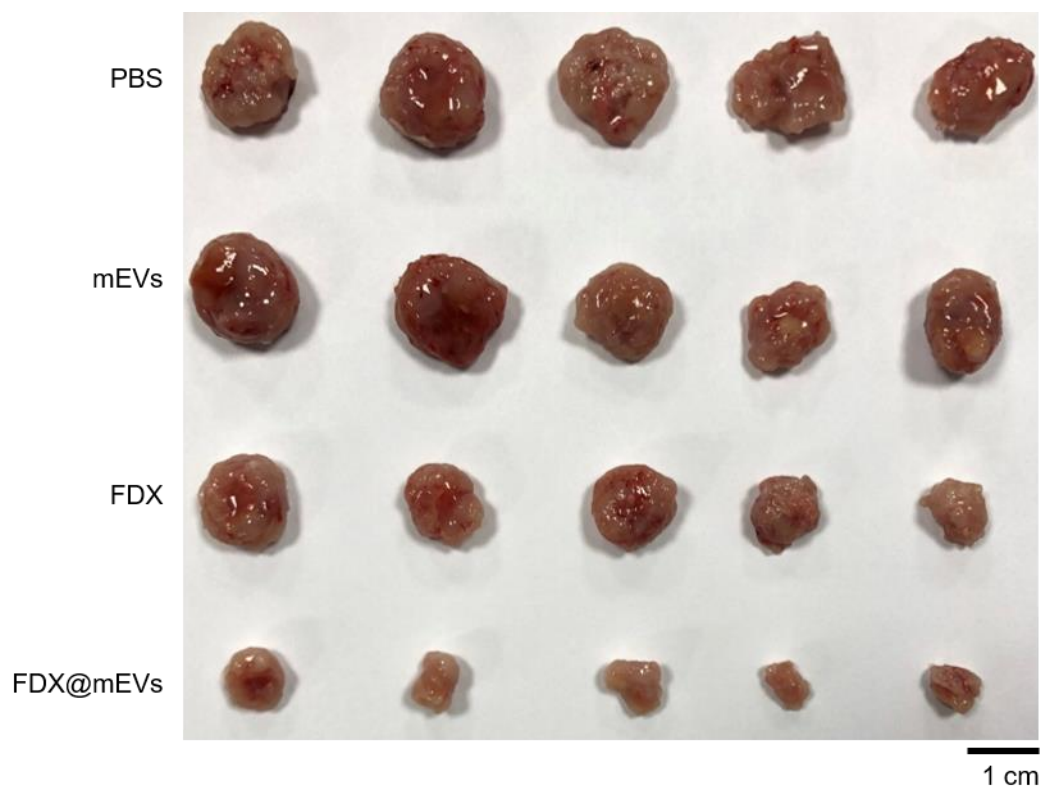

**Figure S13.** Photo of tumor tissues dissected from all tumor-bearing mice. Scale bar: 1 cm.
